# Supplementary material
Source: PubMed Central journal article supplement (PMC3124072)
Supplement: NIHMS295543-supplement-01.pdf [file NIHMS295543-supplement-01.pdf]

## Supplemental Data

### Effectiveness-Based Guidelines for the Prevention of Cardiovascular Disease in Women—2011 Update: A Guideline From the American Heart Association

Mosca et al

© 2011 American Heart Association, Inc.

### General Cardiovascular Disease (10-Year Risk)

(Based on D'Agostino RB Sr, Vasan RS, Pencina MJ, Wolf PA, Cobain M, Massaro JM, Kannel WB. General cardiovascular risk profile for use in primary care: the Framingham Heart Study. *Circulation*. 2008;117:743–753.)

#### Outcome

CVD (coronary death, myocardial infarction, coronary insufficiency, angina, ischemic stroke, hemorrhagic stroke, transient ischemic attack, peripheral artery disease, heart failure)

#### Duration of follow-up

Maximum of 12 years, 10-year risk prediction

#### Population of interest

Individuals 30 to 74 years old and without CVD at the baseline examination

#### Predictors

- Age
- Diabetes
- Smoking
- Treated and untreated systolic blood pressure
- Total cholesterol
- HDL cholesterol

| Estimate of Risk of CVD in Women |       |       |                   |                 |             |        |          |
|----------------------------------|-------|-------|-------------------|-----------------|-------------|--------|----------|
| Points                           | Age   | HDL   | Total Cholesterol | SBP Not Treated | SBP Treated | Smoker | Diabetic |
| <-3                              |       |       |                   | <120            |             |        |          |
| -2                               |       | 60+   |                   |                 |             |        |          |
| -1                               |       | 50–59 |                   |                 | <120        |        |          |
| 0                                | 30–34 | 45–49 | <160              | 120–129         |             | No     | No       |
| 1                                |       | 35–44 | 160–199           | 130–139         |             |        |          |
| 2                                | 35–39 | <35   |                   | 140–149         | 120–129     |        |          |
| 3                                |       |       | 200–239           |                 | 130–139     | Yes    |          |
| 4                                | 40–44 |       | 240–279           | 150–159         |             |        | Yes      |
| 5                                | 45–49 |       | 280+              | 160+            | 140–149     |        |          |
| 6                                |       |       |                   |                 | 150–159     |        |          |
| 7                                | 50–54 |       |                   |                 | 160+        |        |          |
| 8                                | 55–59 |       |                   |                 |             |        |          |
| 9                                | 60–64 |       |                   |                 |             |        |          |
| 10                               | 65–69 |       |                   |                 |             |        |          |
| 11                               | 70–74 |       |                   |                 |             |        |          |
| 12                               | 75+   |       |                   |                 |             |        |          |

SBP indicates systolic blood pressure.

| CVD Risk          |          |  |           |        |  |            |           |
|-------------------|----------|--|-----------|--------|--|------------|-----------|
| Points            | Risk     |  | Points    | Risk   |  | Points     | Risk      |
| <b>-2 or less</b> | Below 1% |  | <b>6</b>  | 3.40%  |  | <b>14</b>  | 11.60%    |
| <b>-1</b>         | 1.00%    |  | <b>7</b>  | 3.90%  |  | <b>15</b>  | 13.50%    |
| <b>0</b>          | 1.10%    |  | <b>8</b>  | 4.60%  |  | <b>16</b>  | 15.60%    |
| <b>1</b>          | 1.50%    |  | <b>9</b>  | 5.40%  |  | <b>17</b>  | 18.10%    |
| <b>2</b>          | 1.80%    |  | <b>10</b> | 6.30%  |  | <b>18</b>  | 20.90%    |
| <b>3</b>          | 2.10%    |  | <b>11</b> | 7.40%  |  | <b>19</b>  | 24.00%    |
| <b>4</b>          | 2.50%    |  | <b>12</b> | 8.60%  |  | <b>20</b>  | 27.50%    |
| <b>5</b>          | 2.90%    |  | <b>13</b> | 10.00% |  | <b>21+</b> | Above 30% |
